# Supplementary material for: Development of a Brief Intervention for Emergency Department Attendees Presenting With Self-Harm and Co-Occurring Substance Use Problems: A Delphi Method Study
Source: PubMed Central journal article supplement (PMC11370783; doi:10.1027/0227-5910/a000933), 2023-11-17
Supplement: cri_45_4_254_esm3.pdf [file cri_45_4_254_esm3.pdf]

### ESM 3: Summary of survey items for which consensus was obtained

| Section                                                                                                               | Question stem                                                                     | Item                                                                                                                               | Survey Round |
|-----------------------------------------------------------------------------------------------------------------------|-----------------------------------------------------------------------------------|------------------------------------------------------------------------------------------------------------------------------------|--------------|
| Intervention timing                                                                                                   | The <b>first contact</b> for the intervention should take place:                  | Immediately after assessment by the Liaison Psychiatry team, face-to-face                                                          | 1            |
|                                                                                                                       | The <b>second contact</b> will be by phone. This should take place:               | 24-72 hours after first contact negotiated between the patient and person delivering the intervention                              | 2            |
|                                                                                                                       | Subsequent contact should take place:                                             | Weekly phone calls for one month plus weekly personalised reminder texts in between phone calls                                    | 2            |
| Content of the intervention                                                                                           | The intervention should involve (Understanding the situation):                    | Exploring the patient's views about underlying reasons for substance use & self-harm                                               | 1            |
|                                                                                                                       |                                                                                   | Exploring the patient's understanding of the relationship between substance use & mental health                                    | 1            |
|                                                                                                                       |                                                                                   | Providing advice on the relationship between substance use & mental health                                                         | 1            |
|                                                                                                                       | The intervention should involve (Building motivation for behavioural change):     | Asking the patient to discuss the pros and cons of reducing their use of substances and self-harm behaviours                       | 1            |
|                                                                                                                       |                                                                                   | Eliciting the patient's thoughts and feelings about the function of substance use & self-harm in their life                        | 1            |
|                                                                                                                       | The intervention should involve (Identifying and coping with triggers and urges): | Asking the patient to identify triggers for substance use & self-harm                                                              | 1            |
|                                                                                                                       |                                                                                   | Encouraging the patient to record and discuss examples of antecedent/triggers, behaviour, consequence in relation to substance use | 1            |
|                                                                                                                       |                                                                                   | Encouraging the patient to record and discuss examples of antecedent/triggers, behaviour, consequence in relation to self-harm     | 1            |
|                                                                                                                       |                                                                                   | Exploring alternative coping strategies and distraction techniques for managing urges to use substance & self-harm                 | 1            |
|                                                                                                                       | The intervention should involve (Preparing for change):                           | Jointly developing a safety plan                                                                                                   | 1            |
| Monitoring the patient's progress in engaging with other community resources e.g., Alcoholics Anonymous or Samaritans |                                                                                   | 1                                                                                                                                  |              |
| Jointly developing a plan for change with an explicit focus on both substance use & self-harm                         |                                                                                   | 1                                                                                                                                  |              |
| Intervention delivery                                                                                                 | The intervention should be delivered by the following staff:                      | First session and follow-up phone calls by Liaison Psychiatry nurses                                                               | 3            |

| <b>Section</b>                     | <b>Question stem</b>                                                                  | <b>Item</b>                                                                           | <b>Survey Round</b> |
|------------------------------------|---------------------------------------------------------------------------------------|---------------------------------------------------------------------------------------|---------------------|
| <b>Outcomes for a future trial</b> | These outcomes should be measured when testing the effectiveness of the intervention: | Hospital readmissions with self-harm                                                  | 1                   |
|                                    |                                                                                       | Self-reported suicidal thoughts, self-harm, and suicide attempts                      | 1                   |
|                                    |                                                                                       | Self-reported use of substances                                                       | 3                   |
|                                    |                                                                                       | Self-reported mental distress                                                         | 1                   |
|                                    |                                                                                       | The patient's views regarding whether the intervention was helpful in their recovery  | 1                   |
|                                    |                                                                                       | The patient's nominated outcome with regards to goals for substance use +/- self-harm | 3                   |
