# Supplementary material for: Development of a Brief Intervention for Emergency Department Attendees Presenting With Self-Harm and Co-Occurring Substance Use Problems: A Delphi Method Study
Source: PubMed Central journal article supplement (PMC11370783; doi:10.1027/0227-5910/a000933), 2023-11-17
Supplement: cri_45_4_254_esm4.pdf [file cri_45_4_254_esm4.pdf]

## ESM 4: Intervention summary

**Inclusion criteria:** adults who present to hospital with self-harm and concurrent substance use problems

**First contact:** face-to-face in the emergency department immediately after a psychosocial assessment

**Second contact:** telephone call 24-72 hours later

**Subsequent contact:** weekly telephone calls for up to one month after hospital presentation

**Other features:** delivery by a Liaison Psychiatry practitioner, personalised reminder texts between sessions, provision of a gift voucher after completion of the intervention

### **Intervention content:**

#### *Understanding the situation*

- 1) Exploring the patient's views about underlying reasons for substance use & self-harm
- 2) Exploring the patient's understanding of the relationship between substance use & mental health
- 3) Providing advice on the relationship between substance use & mental health

#### *Building motivation*

- 4) Asking the patient to describe pros and cons of reducing their use of substances & self-harm
- 5) Eliciting the patient's thoughts and feelings about the function of substance use & self-harm in their life

#### *Identifying and coping with triggers and urges*

- 6) Asking the patient to identify triggers for substance use & self-harm
- 7) Encouraging the patient to record and discuss examples of antecedent/trigger, behaviour, consequence (ABC) in relation to substance use & self-harm
- 8) Exploring alternative coping strategies and distraction techniques for managing urges to use substances & self-harm

#### *Preparing for change*

- 9) Jointly developing a safety plan
- 10) Jointly developing a plan for change with an explicit focus on both substance use & self-harm
- 11) Monitoring the patient's progress in engaging with other community resources e.g., Alcoholics Anonymous or Samaritans
